# Supplementary material for: Multivalent Presentation of Ice Recrystallization Inhibiting Polymers on Nanoparticles Retains Activity
Source: PubMed Central journal article supplement (PMC6354916; doi:10.1021/acs.langmuir.8b01952), 2018-08-22
Supplement: NIHMS79875-supplement-Supp_Info.pdf [file NIHMS79875-supplement-Supp_Info.pdf]

**Electronic Supporting Information for;**

**Multivalent Presentation of Ice Recrystallization Inhibiting Polymers on**

**Nanoparticles Retains Activity**

*Christopher Stubbs,<sup>a‡</sup> Laura E. Wilkins,<sup>a‡</sup> Alice E. R. Fayter,<sup>a</sup> Marc Walker,<sup>b</sup> and Matthew  
I. Gibson<sup>\*a,c</sup>*

<sup>a</sup> Department of Chemistry, University of Warwick, UK CV4 7AL

<sup>b</sup> Department of Physics, University of Warwick, UK CV4 7AL

<sup>c</sup> Warwick Medical School, University of Warwick, UK CV4 7AL

\* Corresponding author. Email [m.i.gibson@warwick.ac.uk](mailto:m.i.gibson@warwick.ac.uk)

‡ These authors contributed equally

### Synthesis of *S*-benzyl *O*-ethyl carbondithioate.

Acetone (40 mL) was added to a round bottom flask equipped with a stirrer bar. Potassium ethyl xanthogenate (2 g, 0.0124 mol, 1 eq.) was added and left to dissolve for 30 minutes. Benzyl bromide (2.13 g, 0.0124 mol, 1 eq.) was added and stirred for 24 hours at 50 °C. The solution was filtered and the filtrate concentrated *in vacuo*. The resulting yellow oil was purified on a column of silica with DCM as eluent. Yield 1.26 g 48 %. <sup>1</sup>H NMR (300 MHz, CDCl<sub>3</sub>): δ = 1.3 (CH<sub>3</sub>CH<sub>2</sub>OC(S)S, t, 3H), 4.3 (OC(S)SCH<sub>2</sub>, s, 2H), 4.6 (CH<sub>3</sub>CH<sub>2</sub>OC(S)S, q, 2H), 7.2 (C(S)SCH<sub>2</sub>C<sub>6</sub>H<sub>5</sub>, br, 5H). <sup>13</sup>C NMR (400 MHz, CDCl<sub>3</sub>): δ = 14 (CH<sub>3</sub>CH<sub>2</sub>), 40 (C(S)SCH<sub>2</sub>), 70 (CH<sub>3</sub>CH<sub>2</sub>), 127 (*para* CH), 128 (*meta* CH), 129 (*ortho* CH), 213 (OC(S)S).

### Synthesis of poly(vinyl acetate)<sub>98</sub>.

As a representative example, vinyl acetate (3 g, 3.21 mL, 34 mmol, 1000 eq), *S*-benzyl *O*-ethyl carbondithioate (0.074 g, 0.34 mmol, 10 eq.), 4,4'-azobis(4-cyanovaleric acid) (0.0098 g, 0.034 mmol, 1 eq.) and mesitylene (0.1 g, 0.086 mL) were added to a 10ml vial and sealed with a subseal. The solution was left to degas under nitrogen for 15 minutes, before being placed into an oil bath at 68 °C. The reaction was left for 24 hours before being plunged into liquid nitrogen. Poly(vinyl acetate) was recovered as a sticky yellow oil after precipitation into diethyl ether.

Representative characterization data for poly(vinyl acetate)<sub>98</sub>:

<sup>1</sup>H NMR (400 MHz, CDCl<sub>3</sub>) δ = 4.90 – 4.70 (CH<sub>2</sub>CH(OOCH<sub>3</sub>), br, 1H), 2.07 (CH<sub>2</sub>CH(OOCH<sub>3</sub>), br, 3H), 1.90-1.60 (CH<sub>2</sub>CH(OOCH<sub>3</sub>), br, 2H).

IR C-H 2954 cm<sup>-1</sup>, C=O 1729 cm<sup>-1</sup>, C-O 1407 cm<sup>-1</sup>.

M<sub>n</sub><sup>SEC</sup>(THF) = 8500 Da, M<sub>w</sub>/M<sub>n</sub> = 1.37

### **Synthesis of poly(vinyl alcohol)<sub>98</sub>.**

As a representative example, poly(vinyl acetate) (1 g) was dissolved in methanol (5 mL) in a round bottom flask and stirred until dissolved. Hydrazine hydrate solution (15 mL, 78-82 % in water) was added and the reaction heated to 50 °C in an oil bath for 24 hours. The solution was cooled and diluted with water (50ml) before being purified by dialysis (100-500 MWCO) followed by lyophilization to form a white powder. Representative characterization data for poly(vinyl alcohol)<sub>98</sub>:

<sup>1</sup>H NMR (400 MHz, D<sub>2</sub>O)  $\delta$  = 4.00 – 3.80 (CH<sub>2</sub>CH(OH), br, 1H), 1.80 – 1.30 (CH<sub>2</sub>CH(OH), br, 2H).

IR O-H 3000-3400 cm<sup>-1</sup>, C-H 2917 cm<sup>-1</sup>, C-O 1411 cm<sup>-1</sup>.

### **Modified Sucrose Sandwich Ice Shaping Assay**

Samples dissolved in PBS buffer containing 45% sucrose were sandwiched between two glass coverslips and sealed with immersion oil. Samples were cooled to –50 °C on a Linkam Biological Cryostage BCS196 with T95-Linkpad system controller equipped with a LNP95-Liquid nitrogen cooling pump, using liquid nitrogen as the coolant (Linkam Scientific Instruments UK, Surrey, U.K.). The temperature was then increased to –8 °C and held for 1 hour to anneal. The samples were then heated at 0.5 °C.min<sup>-1</sup> until few ice crystals remained and then cooled at 0.05 °C.min<sup>-1</sup> and the shape of ice crystals observed. Micrographs were obtained every 0.1 °C using an Olympus CX41 microscope equipped with a UIS-2 20x/0.45/ $\infty$ /0–2/FN22 lens (Olympus Ltd., Southend on sea, U.K.) and a Canon EOS 500D SLR digital. Image processing was conducted using ImageJ.

### **Ice Shaping Image Enhancement**

Ice crystal images contrast was modified in ImageJ to show faceting more clearly, followed by removal of the background using photoshop mix. This enabled the zoomed in images in Figure 4 to be shown. These are directly taken from the images shown in the main panel in Figure 4.

## Additional Polymer Characterization

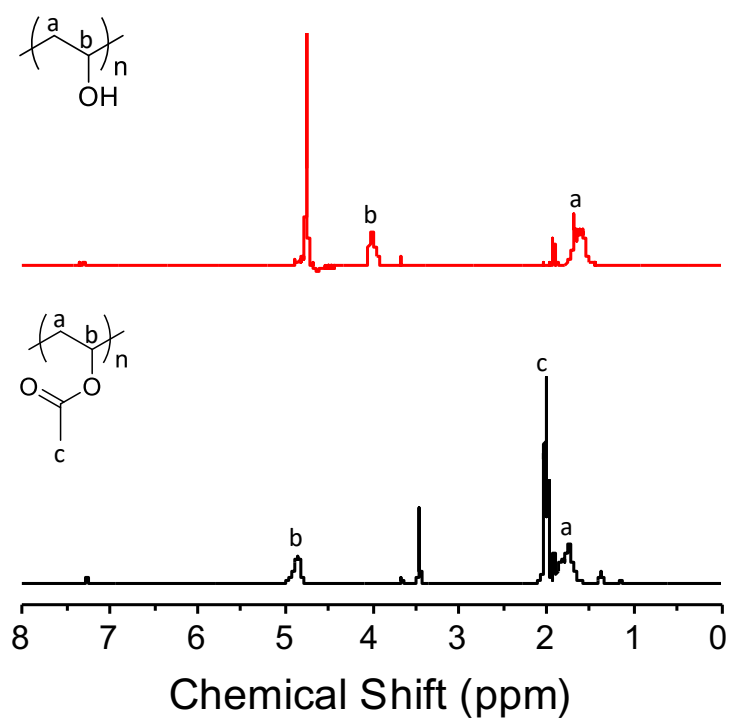

Figure S1.  $^1\text{H}$  NMR spectra showing removal of acetate groups (peak c) from PVAc's

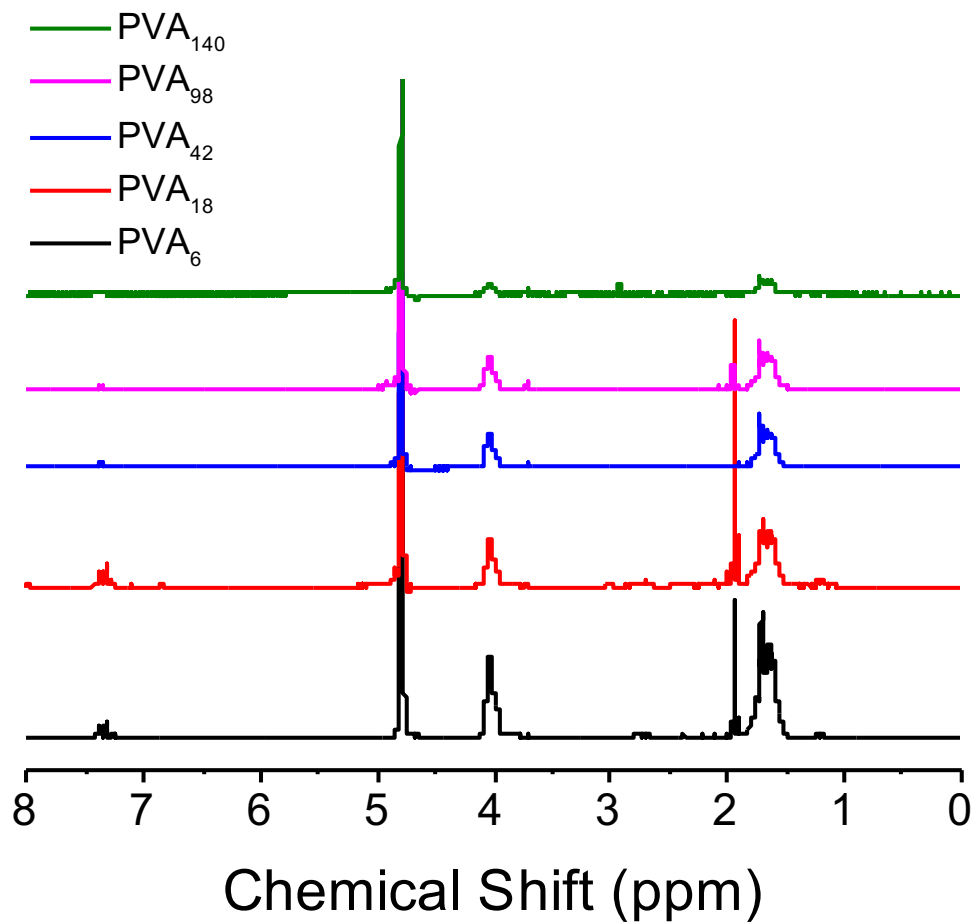

Figure S2: <sup>1</sup>H NMR spectra of the PVA's synthesized in this study.

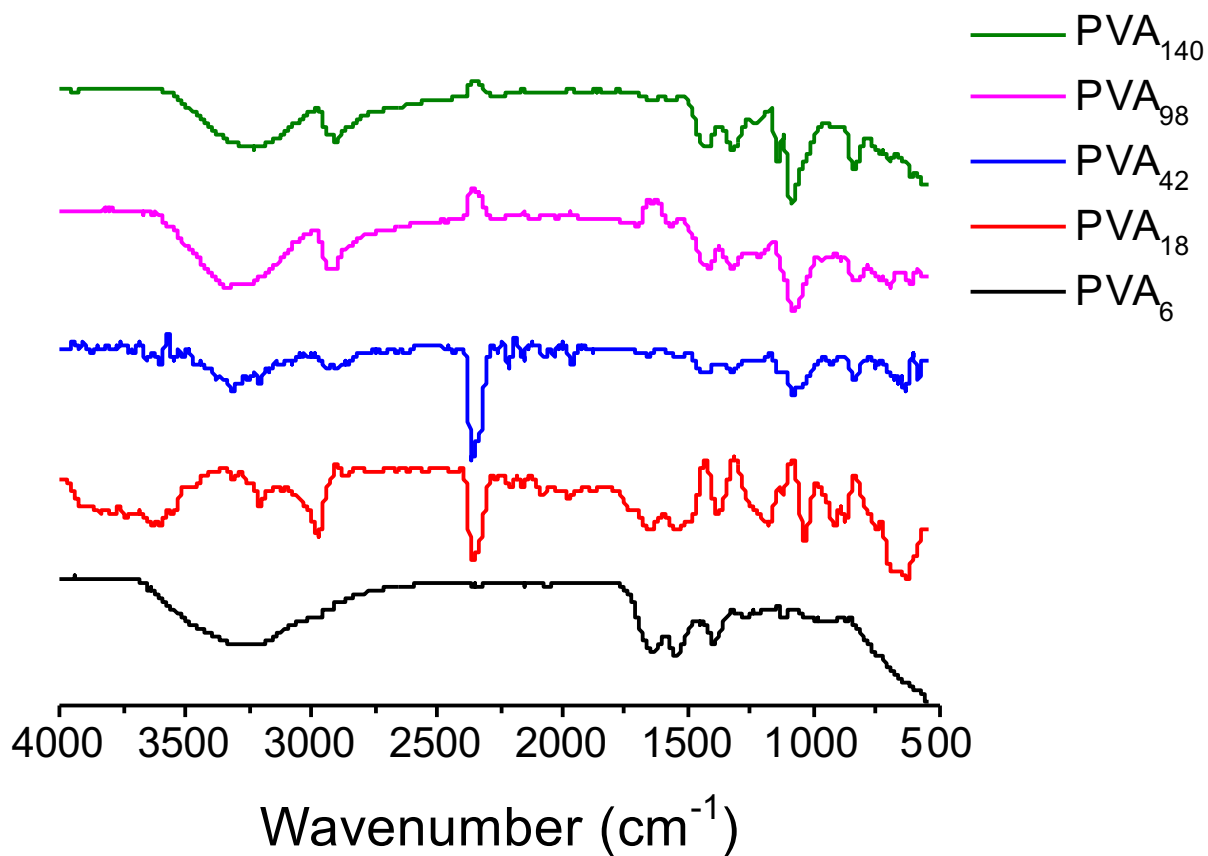

Figure S3: FTIR of the PVAs synthesized in this study (post-hydrolysis of the acetate group)

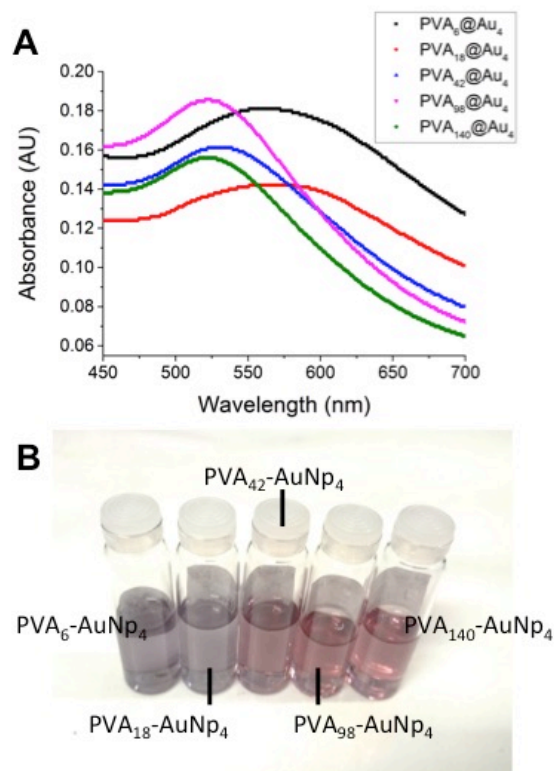

Figure S4. Gold nanoparticle characterization in water. A) UV-visible spectra; B) photographs showing colouration of polymer coated particles.



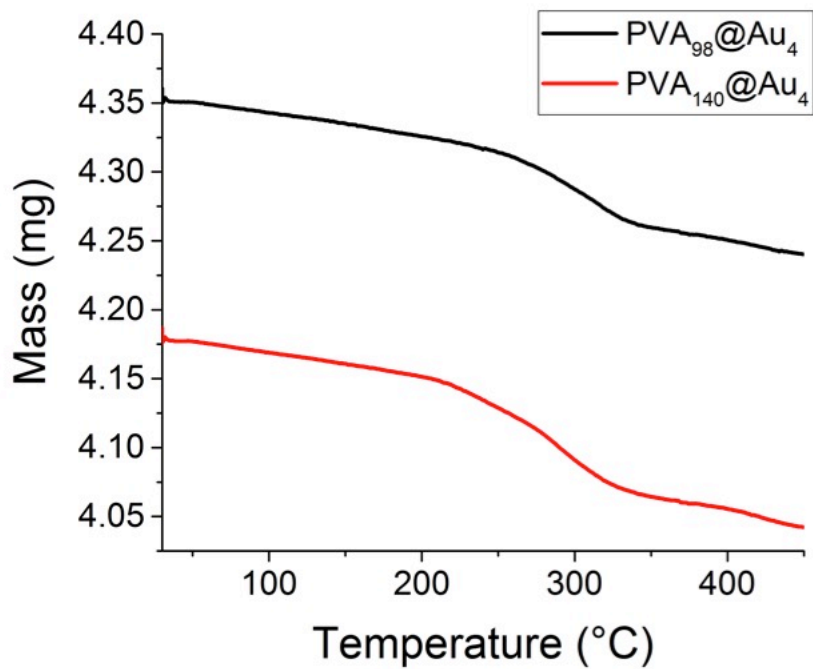

Figure S5. TGA analysis of polymer-coated gold nanoparticles

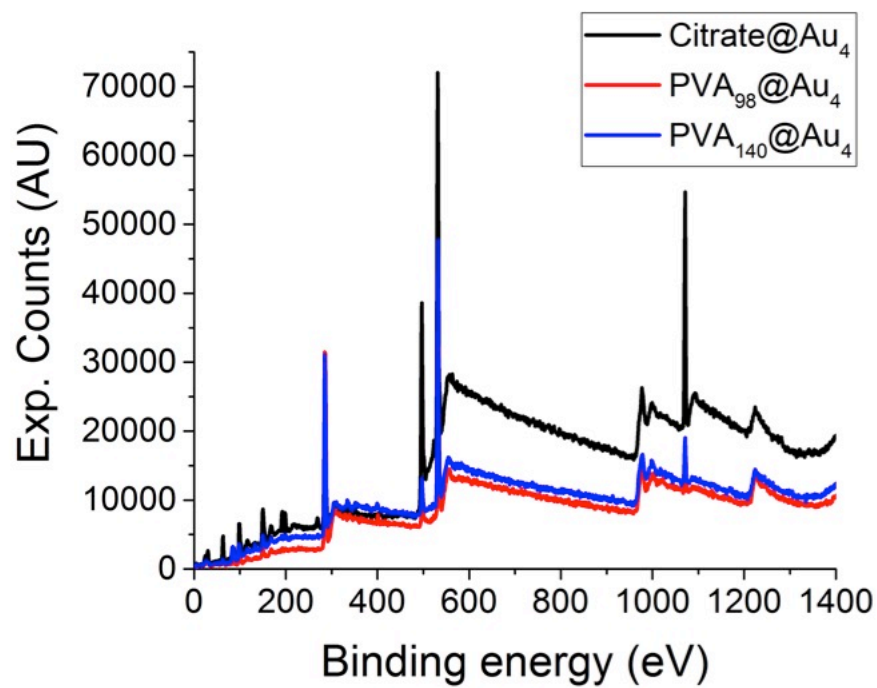

Figure S6. XPS survey scans of nanoparticles.

### Additional IRI Data

As discussed in the main text, PVA<sub>98</sub>@Au<sub>4</sub> was not colloidally stable in the IRI assays. This aggregation reduced the observed activity as a false-negative results. The ‘splat’ assay data on this is included here for completeness.

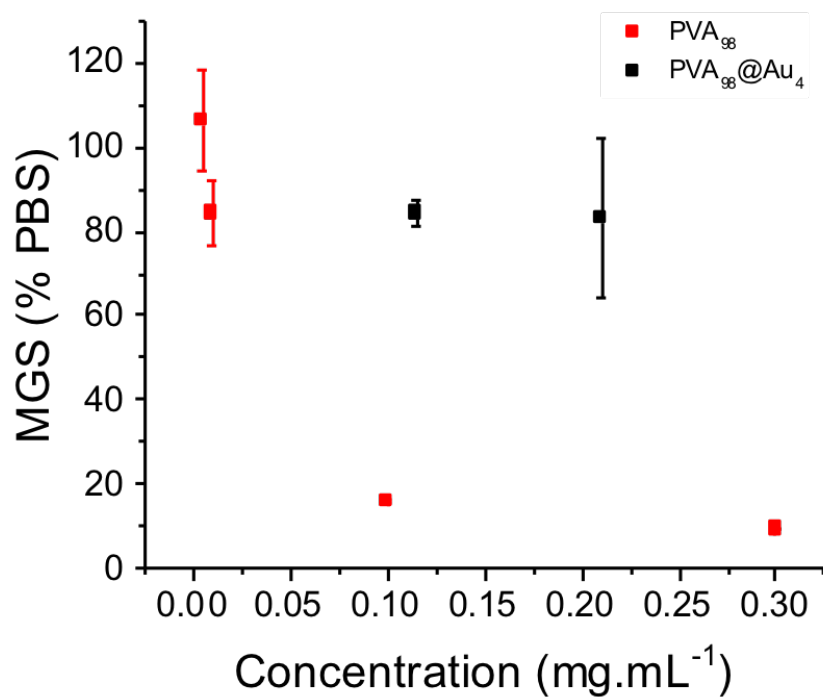

Figure S7. IRI activity assessment of PVA<sub>98</sub>@Au<sub>4</sub>, which was not colloidally stable.

To ensure there is no residual polymer, the washings from the PVA@AuNP purification cycles were analyzed by the Splat assay, Figure S8. PVA retains IRI activity down to  $\sim 0.1 \text{ mg.mL}^{-1}$ . PVA was added at  $1 \text{ mg.mL}^{-1}$  concentration during the synthesis. Figure S8 shows that 3 washings are required to remove PVA such that any (small) residual amounts do not interfere with the IRI activity measurements of the AuNPs.

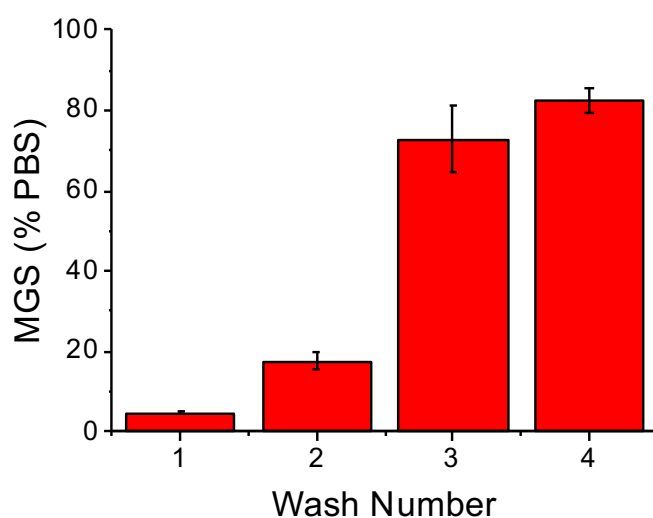

Figure S8. Residual IRI activity (determined *via* splat test) of the washings following centrifugal purification of the PVA@AuNPs. Larger numbers indicate less activity. Errors bars are the standard deviation from 3 sets of measurements.
